# Supplementary material for: Diversity of the longhorned beetles (Coleoptera: Cerambycidae) from Cuatro Ciénegas Basin, Coahuila, Mexico
Source: Biodivers Data J. 2020 Jul 16;8:e54495. doi: 10.3897/BDJ.8.e54495 (PMC7381432; doi:10.3897/BDJ.8.e54495)
Supplement: Supplementary material 1 — Checklist_Taxon_CCB [file bdj-08-e54495-s001.xlsx]

## Sheet: Taxa
Taxon_Local_ID	Kingdom	Subkingdom	Phylum	Subphylum	Superclass	Class	Subclass	Superorder	Order	Suborder	Infraorder	Superfamily	Family	Subfamily	Tribe	Subtribe	Genus	Subgenus	Species	Subspecies	Variety	Form	Authorship	Nomenclature	Feeds on	Symbiotic with	Parasite of	Host of	Native Status	Conservation Status	Distribution	Horizon	Notes
1	Animalia		Arthropoda	Hexapoda		Insecta			Coleoptera	Polyphaga		Chrysomeloidea	Cerambycidae	Prioninae
2	Animalia		Arthropoda	Hexapoda		Insecta			Coleoptera	Polyphaga		Chrysomeloidea	Cerambycidae	Prioninae	Prionini
3	Animalia		Arthropoda	Hexapoda		Insecta			Coleoptera	Polyphaga		Chrysomeloidea	Cerambycidae	Prioninae	Prionini		Derobrachus		hovorei				Santos-Silva, 2007
4	Animalia		Arthropoda	Hexapoda		Insecta			Coleoptera	Polyphaga		Chrysomeloidea	Cerambycidae	Prioninae	Prionini		Derobrachus		hovorei				Santos-Silva, 2007
5	Animalia		Arthropoda	Hexapoda		Insecta			Coleoptera	Polyphaga		Chrysomeloidea	Cerambycidae	Lepturinae
6	Animalia		Arthropoda	Hexapoda		Insecta			Coleoptera	Polyphaga		Chrysomeloidea	Cerambycidae	Lepturinae	Lepturini
7	Animalia		Arthropoda	Hexapoda		Insecta			Coleoptera	Polyphaga		Chrysomeloidea	Cerambycidae	Lepturinae	Lepturini		Typocerus		sinuatus				(Newman, 1841)
8	Animalia		Arthropoda	Hexapoda		Insecta			Coleoptera	Polyphaga		Chrysomeloidea	Cerambycidae	Cerambycinae
9	Animalia		Arthropoda	Hexapoda		Insecta			Coleoptera	Polyphaga		Chrysomeloidea	Cerambycidae	Cerambycinae	Bothriospilini
10	Animalia		Arthropoda	Hexapoda		Insecta			Coleoptera	Polyphaga		Chrysomeloidea	Cerambycidae	Cerambycinae	Bothriospilini		Knulliana		cincta	cincta			(Drury, 1773)
11	Animalia		Arthropoda	Hexapoda		Insecta			Coleoptera	Polyphaga		Chrysomeloidea	Cerambycidae	Cerambycinae	Clytini
12	Animalia		Arthropoda	Hexapoda		Insecta			Coleoptera	Polyphaga		Chrysomeloidea	Cerambycidae	Cerambycinae	Clytini		Megacyllene		antennata				(White, 1855)
13	Animalia		Arthropoda	Hexapoda		Insecta			Coleoptera	Polyphaga		Chrysomeloidea	Cerambycidae	Cerambycinae	Clytini		Placosternus		erythropus				(Chevrolat, 1835)
14	Animalia		Arthropoda	Hexapoda		Insecta			Coleoptera	Polyphaga		Chrysomeloidea	Cerambycidae	Cerambycinae	Clytini		Placosternus		erythropus				(Chevrolat, 1835)
15	Animalia		Arthropoda	Hexapoda		Insecta			Coleoptera	Polyphaga		Chrysomeloidea	Cerambycidae	Cerambycinae	Clytini		Placosternus		erythropus				(Chevrolat, 1835)
16	Animalia		Arthropoda	Hexapoda		Insecta			Coleoptera	Polyphaga		Chrysomeloidea	Cerambycidae	Cerambycinae	Clytini		Tanyochraethes		hololeucus				(Bates, 1892)
17	Animalia		Arthropoda	Hexapoda		Insecta			Coleoptera	Polyphaga		Chrysomeloidea	Cerambycidae	Cerambycinae	Clytini		Tanyochraethes		hololeucus				(Bates, 1892)
18	Animalia		Arthropoda	Hexapoda		Insecta			Coleoptera	Polyphaga		Chrysomeloidea	Cerambycidae	Cerambycinae	Eburiini
19	Animalia		Arthropoda	Hexapoda		Insecta			Coleoptera	Polyphaga		Chrysomeloidea	Cerambycidae	Cerambycinae	Eburiini		Eburia		juanitae				Chemsak and Linsley, 1970
20	Animalia		Arthropoda	Hexapoda		Insecta			Coleoptera	Polyphaga		Chrysomeloidea	Cerambycidae	Cerambycinae	Eburiini		Eburia		paraegrota				Chemsak and Linsley, 1973
21	Animalia		Arthropoda	Hexapoda		Insecta			Coleoptera	Polyphaga		Chrysomeloidea	Cerambycidae	Cerambycinae	Eburiini		Eburia		paraegrota				Chemsak and Linsley, 1973
22	Animalia		Arthropoda	Hexapoda		Insecta			Coleoptera	Polyphaga		Chrysomeloidea	Cerambycidae	Cerambycinae	Eburiini		Eburia		paraegrota				Chemsak and Linsley, 1973
23	Animalia		Arthropoda	Hexapoda		Insecta			Coleoptera	Polyphaga		Chrysomeloidea	Cerambycidae	Cerambycinae	Elaphidiini
24	Animalia		Arthropoda	Hexapoda		Insecta			Coleoptera	Polyphaga		Chrysomeloidea	Cerambycidae	Cerambycinae	Elaphidiini		Aneflus		obscurus				(LeConte, 1873)
25	Animalia		Arthropoda	Hexapoda		Insecta			Coleoptera	Polyphaga		Chrysomeloidea	Cerambycidae	Cerambycinae	Elaphidiini		Aneflus		obscurus				(LeConte, 1873)
26	Animalia		Arthropoda	Hexapoda		Insecta			Coleoptera	Polyphaga		Chrysomeloidea	Cerambycidae	Cerambycinae	Elaphidiini		Aneflus		prolixus	insoletus			Chemsak and Linsley, 1963
27	Animalia		Arthropoda	Hexapoda		Insecta			Coleoptera	Polyphaga		Chrysomeloidea	Cerambycidae	Cerambycinae	Elaphidiini		Aneflomorpha		rectilinea	rectilinea			Casey, 1924
28	Animalia		Arthropoda	Hexapoda		Insecta			Coleoptera	Polyphaga		Chrysomeloidea	Cerambycidae	Cerambycinae	Elaphidiini		Aneflomorpha		rectilinea	rectilinea			Casey, 1924
29	Animalia		Arthropoda	Hexapoda		Insecta			Coleoptera	Polyphaga		Chrysomeloidea	Cerambycidae	Cerambycinae	Elaphidiini		Aneflomorpha		werneri				Chemsak, 1962
30	Animalia		Arthropoda	Hexapoda		Insecta			Coleoptera	Polyphaga		Chrysomeloidea	Cerambycidae	Cerambycinae	Elaphidiini		Anelaphus		moestus	moestus			(LeConte, 1854)
31	Animalia		Arthropoda	Hexapoda		Insecta			Coleoptera	Polyphaga		Chrysomeloidea	Cerambycidae	Cerambycinae	Elaphidiini		Anopliomorpha		rinconia				(Casey, 1924)
32	Animalia		Arthropoda	Hexapoda		Insecta			Coleoptera	Polyphaga		Chrysomeloidea	Cerambycidae	Cerambycinae	Elaphidiini		Elaphidionopsis		fasciatipennis				Linsley, 1936
33	Animalia		Arthropoda	Hexapoda		Insecta			Coleoptera	Polyphaga		Chrysomeloidea	Cerambycidae	Cerambycinae	Elaphidiini		Neaneflus		brevispinus				Chemsak, 1962
34	Animalia		Arthropoda	Hexapoda		Insecta			Coleoptera	Polyphaga		Chrysomeloidea	Cerambycidae	Cerambycinae	Elaphidiini		Neaneflus		brevispinus				Chemsak, 1962
35	Animalia		Arthropoda	Hexapoda		Insecta			Coleoptera	Polyphaga		Chrysomeloidea	Cerambycidae	Cerambycinae	Hesperophanini
36	Animalia		Arthropoda	Hexapoda		Insecta			Coleoptera	Polyphaga		Chrysomeloidea	Cerambycidae	Cerambycinae	Hesperophanini		Haplidus		laticeps				Knull, 1941
37	Animalia		Arthropoda	Hexapoda		Insecta			Coleoptera	Polyphaga		Chrysomeloidea	Cerambycidae	Cerambycinae	Methiini
38	Animalia		Arthropoda	Hexapoda		Insecta			Coleoptera	Polyphaga		Chrysomeloidea	Cerambycidae	Cerambycinae	Methiini		Methia		mormona				Linell, 1897
39	Animalia		Arthropoda	Hexapoda		Insecta			Coleoptera	Polyphaga		Chrysomeloidea	Cerambycidae	Cerambycinae	Trachyderini
40	Animalia		Arthropoda	Hexapoda		Insecta			Coleoptera	Polyphaga		Chrysomeloidea	Cerambycidae	Cerambycinae	Trachyderini		Crossidius		suturalis	suturalis			LeConte, 1858
41	Animalia		Arthropoda	Hexapoda		Insecta			Coleoptera	Polyphaga		Chrysomeloidea	Cerambycidae	Cerambycinae	Trachyderini		Crossidius		suturalis	suturalis			LeConte, 1858
42	Animalia		Arthropoda	Hexapoda		Insecta			Coleoptera	Polyphaga		Chrysomeloidea	Cerambycidae	Cerambycinae	Trachyderini		Crossidius		suturalis	suturalis			LeConte, 1858
43	Animalia		Arthropoda	Hexapoda		Insecta			Coleoptera	Polyphaga		Chrysomeloidea	Cerambycidae	Cerambycinae	Trachyderini		Crossidius		suturalis	suturalis			LeConte, 1858
44	Animalia		Arthropoda	Hexapoda		Insecta			Coleoptera	Polyphaga		Chrysomeloidea	Cerambycidae	Cerambycinae	Trachyderini		Crossidius		suturalis	suturalis			LeConte, 1858
45	Animalia		Arthropoda	Hexapoda		Insecta			Coleoptera	Polyphaga		Chrysomeloidea	Cerambycidae	Cerambycinae	Trachyderini		Crossidius		suturalis	suturalis			LeConte, 1858
46	Animalia		Arthropoda	Hexapoda		Insecta			Coleoptera	Polyphaga		Chrysomeloidea	Cerambycidae	Cerambycinae	Trachyderini		Neocrossidius		trivittatus				(Bates, 1880)
47	Animalia		Arthropoda	Hexapoda		Insecta			Coleoptera	Polyphaga		Chrysomeloidea	Cerambycidae	Cerambycinae	Trachyderini		Neocrossidius		trivittatus				(Bates, 1880)
48	Animalia		Arthropoda	Hexapoda		Insecta			Coleoptera	Polyphaga		Chrysomeloidea	Cerambycidae	Cerambycinae	Trachyderini		Parevander		hovorei				Giesbert, 1984
49	Animalia		Arthropoda	Hexapoda		Insecta			Coleoptera	Polyphaga		Chrysomeloidea	Cerambycidae	Cerambycinae	Trachyderini		Parevander		hovorei				Giesbert, 1984
50	Animalia		Arthropoda	Hexapoda		Insecta			Coleoptera	Polyphaga		Chrysomeloidea	Cerambycidae	Cerambycinae	Trachyderini		Parevander		hovorei				Giesbert, 1984
51	Animalia		Arthropoda	Hexapoda		Insecta			Coleoptera	Polyphaga		Chrysomeloidea	Cerambycidae	Cerambycinae	Trachyderini		Plionoma		suturalis				(LeConte, 1858)
52	Animalia		Arthropoda	Hexapoda		Insecta			Coleoptera	Polyphaga		Chrysomeloidea	Cerambycidae	Cerambycinae	Trachyderini		Plionoma		suturalis				(LeConte, 1858)
53	Animalia		Arthropoda	Hexapoda		Insecta			Coleoptera	Polyphaga		Chrysomeloidea	Cerambycidae	Cerambycinae	Trachyderini		Sphaenothecus		bilineatus				(Gory in Guérin-Méneville, 1831)
54	Animalia		Arthropoda	Hexapoda		Insecta			Coleoptera	Polyphaga		Chrysomeloidea	Cerambycidae	Cerambycinae	Trachyderini		Stenaspis		solitaria				(Say, 1824)
55	Animalia		Arthropoda	Hexapoda		Insecta			Coleoptera	Polyphaga		Chrysomeloidea	Cerambycidae	Cerambycinae	Trachyderini		Stenaspis		solitaria				(Say, 1824)
56	Animalia		Arthropoda	Hexapoda		Insecta			Coleoptera	Polyphaga		Chrysomeloidea	Cerambycidae	Cerambycinae	Trachyderini		Tylosis		jimenezi				Dugés, 1879
57	Animalia		Arthropoda	Hexapoda		Insecta			Coleoptera	Polyphaga		Chrysomeloidea	Cerambycidae	Cerambycinae	Trachyderini		Tylosis		jimenezi				Dugés, 1879
58	Animalia		Arthropoda	Hexapoda		Insecta			Coleoptera	Polyphaga		Chrysomeloidea	Cerambycidae	Cerambycinae	Trachyderini		Tylosis		jimenezi				Dugés, 1879
59	Animalia		Arthropoda	Hexapoda		Insecta			Coleoptera	Polyphaga		Chrysomeloidea	Cerambycidae	Lamiinae
60	Animalia		Arthropoda	Hexapoda		Insecta			Coleoptera	Polyphaga		Chrysomeloidea	Cerambycidae	Lamiinae	Acanthocinini
61	Animalia		Arthropoda	Hexapoda		Insecta			Coleoptera	Polyphaga		Chrysomeloidea	Cerambycidae	Lamiinae	Acanthocinini		Moneilema		armatum				LeConte, 1853
62	Animalia		Arthropoda	Hexapoda		Insecta			Coleoptera	Polyphaga		Chrysomeloidea	Cerambycidae	Lamiinae	Onciderini
63	Animalia		Arthropoda	Hexapoda		Insecta			Coleoptera	Polyphaga		Chrysomeloidea	Cerambycidae	Lamiinae	Onciderini		Oncideres		rhodosticta				Bates, 1885
64	Animalia		Arthropoda	Hexapoda		Insecta			Coleoptera	Polyphaga		Chrysomeloidea	Cerambycidae	Lamiinae	Onciderini		Oncideres		rhodosticta				Bates, 1885
65	Animalia		Arthropoda	Hexapoda		Insecta			Coleoptera	Polyphaga		Chrysomeloidea	Cerambycidae	Prioninae
66	Animalia		Arthropoda	Hexapoda		Insecta			Coleoptera	Polyphaga		Chrysomeloidea	Cerambycidae	Prioninae	Prionini
67	Animalia		Arthropoda	Hexapoda		Insecta			Coleoptera	Polyphaga		Chrysomeloidea	Cerambycidae	Prioninae	Prionini		Prionus		poultoni				Lameere, 1912
68	Animalia		Arthropoda	Hexapoda		Insecta			Coleoptera	Polyphaga		Chrysomeloidea	Cerambycidae	Lepturinae
69	Animalia		Arthropoda	Hexapoda		Insecta			Coleoptera	Polyphaga		Chrysomeloidea	Cerambycidae	Lepturinae	Lepturini
70	Animalia		Arthropoda	Hexapoda		Insecta			Coleoptera	Polyphaga		Chrysomeloidea	Cerambycidae	Lepturinae	Lepturini		Meloemorpha		aliena				(Bates, 1880)
71	Animalia		Arthropoda	Hexapoda		Insecta			Coleoptera	Polyphaga		Chrysomeloidea	Cerambycidae	Lepturinae	Lepturini		Meloemorpha		aliena				(Bates, 1880)
72	Animalia		Arthropoda	Hexapoda		Insecta			Coleoptera	Polyphaga		Chrysomeloidea	Cerambycidae	Cerambycinae
73	Animalia		Arthropoda	Hexapoda		Insecta			Coleoptera	Polyphaga		Chrysomeloidea	Cerambycidae	Cerambycinae	Clytini
74	Animalia		Arthropoda	Hexapoda		Insecta			Coleoptera	Polyphaga		Chrysomeloidea	Cerambycidae	Cerambycinae	Clytini		Neoclytus		mucronatus	mucronatus			(Fabricius, 1775)
75	Animalia		Arthropoda	Hexapoda		Insecta			Coleoptera	Polyphaga		Chrysomeloidea	Cerambycidae	Cerambycinae	Clytini		Neoclytus		mucronatus	mucronatus			(Fabricius, 1775)
76	Animalia		Arthropoda	Hexapoda		Insecta			Coleoptera	Polyphaga		Chrysomeloidea	Cerambycidae	Cerambycinae	Clytini		Neoclytus		mucronatus	mucronatus			(Fabricius, 1775)
77	Animalia		Arthropoda	Hexapoda		Insecta			Coleoptera	Polyphaga		Chrysomeloidea	Cerambycidae	Cerambycinae	Eburiini
78	Animalia		Arthropoda	Hexapoda		Insecta			Coleoptera	Polyphaga		Chrysomeloidea	Cerambycidae	Cerambycinae	Eburiini		Eburia		maccartyi				Noguera, 2002
79	Animalia		Arthropoda	Hexapoda		Insecta			Coleoptera	Polyphaga		Chrysomeloidea	Cerambycidae	Cerambycinae	Elaphidiini
80	Animalia		Arthropoda	Hexapoda		Insecta			Coleoptera	Polyphaga		Chrysomeloidea	Cerambycidae	Cerambycinae	Elaphidiini		Stenosphenus		dolosus				Horn, 1885
81	Animalia		Arthropoda	Hexapoda		Insecta			Coleoptera	Polyphaga		Chrysomeloidea	Cerambycidae	Cerambycinae	Rhopalophorini
82	Animalia		Arthropoda	Hexapoda		Insecta			Coleoptera	Polyphaga		Chrysomeloidea	Cerambycidae	Cerambycinae	Rhopalophorini		Rhopalophora		angustata				Schaeffer, 1905
83	Animalia		Arthropoda	Hexapoda		Insecta			Coleoptera	Polyphaga		Chrysomeloidea	Cerambycidae	Cerambycinae	Rhopalophorini		Rhopalophora		angustata				Schaeffer, 1905
84	Animalia		Arthropoda	Hexapoda		Insecta			Coleoptera	Polyphaga		Chrysomeloidea	Cerambycidae	Cerambycinae	Tillomorphini
85	Animalia		Arthropoda	Hexapoda		Insecta			Coleoptera	Polyphaga		Chrysomeloidea	Cerambycidae	Cerambycinae	Tillomorphini		Euderces		basimaculatus				Giesbert and Chemsak, 1997
86	Animalia		Arthropoda	Hexapoda		Insecta			Coleoptera	Polyphaga		Chrysomeloidea	Cerambycidae	Cerambycinae	Trachyderini
87	Animalia		Arthropoda	Hexapoda		Insecta			Coleoptera	Polyphaga		Chrysomeloidea	Cerambycidae	Cerambycinae	Trachyderini		Chemsakiella		michelbacheri				(Chemsak, 1984)
88	Animalia		Arthropoda	Hexapoda		Insecta			Coleoptera	Polyphaga		Chrysomeloidea	Cerambycidae	Cerambycinae	Trachyderini		Crossidius		mexicanus				Chemsak and Noguera, 1997
89	Animalia		Arthropoda	Hexapoda		Insecta			Coleoptera	Polyphaga		Chrysomeloidea	Cerambycidae	Cerambycinae	Trachyderini		Crossidius		mexicanus				Chemsak and Noguera, 1997
90	Animalia		Arthropoda	Hexapoda		Insecta			Coleoptera	Polyphaga		Chrysomeloidea	Cerambycidae	Cerambycinae	Trachyderini		Elytroleptus		divisus				(LeConte, 1884)

## Sheet: Materials
Taxon_Local_ID	typeStatus	occurrenceID	catalogNumber	occurrenceDetails	occurrenceRemarks	recordNumber	recordedBy	individualID	individualCount	sex	lifeStage	reproductiveCondition	behavior	establishmentMeans	occurrenceStatus	preparations	disposition	otherCatalogNumbers	previousIdentifications	associatedMedia	associatedReferences	associatedOccurrences	associatedSequences	taxonID	scientificNameID	acceptedNameUsageID	parentNameUsageID	originalNameUsageID	nameAccordingToID	namePublishedInID	taxonConceptID	scientificName	acceptedNameUsage	parentNameUsage	originalNameUsage	nameAccordingTo	namePublishedIn	higherClassification	kingdom	phylum	class	order	family	genus	subgenus	specificEpithet	infraspecificEpithet	taxonRank	verbatimTaxonRank
3	Other material	CCB-CER1	MZ-CCB-CER001				Marysol Trujano and Uri García		1		Adult																					Derobrachus hovorei							Animalia	Arthropoda	Insecta	Coleoptera	Cerambycidae
4	Other material	CCB-CER2	MZ-CCB-CER002				Marysol Trujano and Uri García		1		Adult																					Derobrachus hovorei							Animalia	Arthropoda	Insecta	Coleoptera	Cerambycidae
7	Other material	CCB-CER3	MZ-CCB-CER003				Marysol Trujano and Uri García		1		Adult																					Typocerus sinuatus							Animalia	Arthropoda	Insecta	Coleoptera	Cerambycidae
10	Other material	CCB-CER4	MZ-CCB-CER004				Marysol Trujano and Uri García		1		Adult																					Knulliana cincta cincta							Animalia	Arthropoda	Insecta	Coleoptera	Cerambycidae
12	Other material	CCB-CER5	MZ-CCB-CER005				Marysol Trujano and Uri García		1		Adult																					Megacyllene antennata							Animalia	Arthropoda	Insecta	Coleoptera	Cerambycidae
13	Other material	CCB-CER6	MZ-CCB-CER006				Marysol Trujano and Uri García		1		Adult																					Placosternus erythropus							Animalia	Arthropoda	Insecta	Coleoptera	Cerambycidae
14	Other material	CCB-CER7	MZ-CCB-CER007				Marysol Trujano and Uri García		1		Adult																					Placosternus erythropus							Animalia	Arthropoda	Insecta	Coleoptera	Cerambycidae
15	Other material	CCB-CER8	MZ-CCB-CER008				Marysol Trujano and Uri García		1		Adult																					Placosternus erythropus							Animalia	Arthropoda	Insecta	Coleoptera	Cerambycidae
16	Other material	CCB-CER9	MZ-CCB-CER009				Marysol Trujano and Uri García		1		Adult																					Tanyochraethes hololeucus							Animalia	Arthropoda	Insecta	Coleoptera	Cerambycidae
17	Other material	CCB-CER10	MZ-CCB-CER010				Marysol Trujano and Uri García		1		Adult																					Tanyochraethes hololeucus							Animalia	Arthropoda	Insecta	Coleoptera	Cerambycidae
19	Other material	CCB-CER11	MZ-CCB-CER011				Marysol Trujano and Uri García		1		Adult																					Eburia juanitae							Animalia	Arthropoda	Insecta	Coleoptera	Cerambycidae
20	Other material	CCB-CER12	MZ-CCB-CER012				Marysol Trujano and Uri García		1		Adult																					Eburia paraegrota							Animalia	Arthropoda	Insecta	Coleoptera	Cerambycidae
21	Other material	CCB-CER13	MZ-CCB-CER013				Marysol Trujano and Uri García		1		Adult																					Eburia paraegrota							Animalia	Arthropoda	Insecta	Coleoptera	Cerambycidae
22	Other material	CCB-CER14	MZ-CCB-CER014				Marysol Trujano and Uri García		1		Adult																					Eburia paraegrota							Animalia	Arthropoda	Insecta	Coleoptera	Cerambycidae
24	Other material	CCB-CER15	MZ-CCB-CER015				Marysol Trujano and Uri García		1		Adult																					Aneflus obscurus							Animalia	Arthropoda	Insecta	Coleoptera	Cerambycidae
25	Other material	CCB-CER16	MZ-CCB-CER016				Marysol Trujano and Uri García		1		Adult																					Aneflus obscurus							Animalia	Arthropoda	Insecta	Coleoptera	Cerambycidae
26	Other material	CCB-CER17	MZ-CCB-CER017				Marysol Trujano and Uri García		1		Adult																					Aneflus prolixus insoletus							Animalia	Arthropoda	Insecta	Coleoptera	Cerambycidae
27	Other material	CCB-CER18	MZ-CCB-CER018				Marysol Trujano and Uri García		1		Adult																					Aneflomorpha rectilinea							Animalia	Arthropoda	Insecta	Coleoptera	Cerambycidae
28	Other material	CCB-CER19	MZ-CCB-CER019				Marysol Trujano and Uri García		1		Adult																					Aneflomorpha rectilinea							Animalia	Arthropoda	Insecta	Coleoptera	Cerambycidae
29	Other material	CCB-CER20	MZ-CCB-CER020				Marysol Trujano and Uri García		1		Adult																					Aneflomorpha werneri							Animalia	Arthropoda	Insecta	Coleoptera	Cerambycidae
30	Other material	CCB-CER21	MZ-CCB-CER021				Marysol Trujano and Uri García		1		Adult																					Anelaphus moestus moestus							Animalia	Arthropoda	Insecta	Coleoptera	Cerambycidae
31	Other material	CCB-CER22	MZ-CCB-CER022				Marysol Trujano and Uri García		1		Adult																					Anopliomorpha rinconia							Animalia	Arthropoda	Insecta	Coleoptera	Cerambycidae
32	Other material	CCB-CER23	MZ-CCB-CER023				Marysol Trujano and Uri García		1		Adult																					Elaphidionopsis fasciatipennis							Animalia	Arthropoda	Insecta	Coleoptera	Cerambycidae
33	Other material	CCB-CER24	MZ-CCB-CER024				Marysol Trujano and Uri García		1		Adult																					Neaneflus brevispinus							Animalia	Arthropoda	Insecta	Coleoptera	Cerambycidae
34	Other material	CCB-CER25	MZ-CCB-CER025				Marysol Trujano and Uri García		1		Adult																					Neaneflus brevispinus							Animalia	Arthropoda	Insecta	Coleoptera	Cerambycidae
36	Other material	CCB-CER26	MZ-CCB-CER026				Marysol Trujano and Uri García		1		Adult																					Haplidus laticeps							Animalia	Arthropoda	Insecta	Coleoptera	Cerambycidae
38	Other material	CCB-CER27	MZ-CCB-CER027				Marysol Trujano and Uri García		1		Adult																					Methia mormona							Animalia	Arthropoda	Insecta	Coleoptera	Cerambycidae
40	Other material	CCB-CER28	MZ-CCB-CER028				Marysol Trujano and Uri García		1		Adult																					Crossidius suturalis suturalis							Animalia	Arthropoda	Insecta	Coleoptera	Cerambycidae
41	Other material	CCB-CER29	MZ-CCB-CER029				Marysol Trujano and Uri García		1		Adult																					Crossidius suturalis suturalis							Animalia	Arthropoda	Insecta	Coleoptera	Cerambycidae
42	Other material	CCB-CER30	MZ-CCB-CER030				Marysol Trujano and Uri García		1		Adult																					Crossidius suturalis suturalis							Animalia	Arthropoda	Insecta	Coleoptera	Cerambycidae
43	Other material	CCB-CER31	MZ-CCB-CER031				Marysol Trujano and Uri García		1		Adult																					Crossidius suturalis suturalis							Animalia	Arthropoda	Insecta	Coleoptera	Cerambycidae
44	Other material	CCB-CER32	MZ-CCB-CER032				Marysol Trujano and Uri García		1		Adult																					Crossidius suturalis suturalis							Animalia	Arthropoda	Insecta	Coleoptera	Cerambycidae
45	Other material	CCB-CER33	MZ-CCB-CER033				Marysol Trujano and Uri García		1		Adult																					Crossidius suturalis suturalis							Animalia	Arthropoda	Insecta	Coleoptera	Cerambycidae
46	Other material	CCB-CER34	MZ-CCB-CER034				Marysol Trujano and Uri García		1		Adult																					Neocrossidius trivittatus							Animalia	Arthropoda	Insecta	Coleoptera	Cerambycidae
47	Other material	CCB-CER35	MZ-CCB-CER035				Marysol Trujano and Uri García		1		Adult																					Neocrossidius trivittatus							Animalia	Arthropoda	Insecta	Coleoptera	Cerambycidae
48	Other material	CCB-CER36	MZ-CCB-CER036				Marysol Trujano and Uri García		1		Adult																					Parevander hovorei							Animalia	Arthropoda	Insecta	Coleoptera	Cerambycidae
49	Other material	CCB-CER37	MZ-CCB-CER037				Marysol Trujano and Uri García		1		Adult																					Parevander hovorei							Animalia	Arthropoda	Insecta	Coleoptera	Cerambycidae
50	Other material	CCB-CER38	MZ-CCB-CER038				Marysol Trujano and Uri García		1		Adult																					Parevander hovorei							Animalia	Arthropoda	Insecta	Coleoptera	Cerambycidae
51	Other material	CCB-CER39	MZ-CCB-CER039				Marysol Trujano and Uri García		1		Adult																					Plionoma suturalis							Animalia	Arthropoda	Insecta	Coleoptera	Cerambycidae
52	Other material	CCB-CER40	MZ-CCB-CER040				Marysol Trujano and Uri García		1		Adult																					Plionoma suturalis							Animalia	Arthropoda	Insecta	Coleoptera	Cerambycidae
53	Other material	CCB-CER41	MZ-CCB-CER041				Marysol Trujano and Uri García		1		Adult																					Sphaenothecus bilineatus							Animalia	Arthropoda	Insecta	Coleoptera	Cerambycidae
54	Other material	CCB-CER42	MZ-CCB-CER042				Marysol Trujano and Uri García		1		Adult																					Stenaspis solitaria							Animalia	Arthropoda	Insecta	Coleoptera	Cerambycidae
55	Other material	CCB-CER43	MZ-CCB-CER043				Marysol Trujano and Uri García		1		Adult																					Stenaspis solitaria							Animalia	Arthropoda	Insecta	Coleoptera	Cerambycidae
56	Other material	CCB-CER44	MZ-CCB-CER044				Marysol Trujano and Uri García		1		Adult																					Tylosis jimenezi							Animalia	Arthropoda	Insecta	Coleoptera	Cerambycidae
57	Other material	CCB-CER45	MZ-CCB-CER045				Marysol Trujano and Uri García		1		Adult																					Tylosis jimenezi							Animalia	Arthropoda	Insecta	Coleoptera	Cerambycidae
58	Other material	CCB-CER46	MZ-CCB-CER046				Marysol Trujano and Uri García		1		Adult																					Tylosis jimenezi							Animalia	Arthropoda	Insecta	Coleoptera	Cerambycidae
61	Other material	CCB-CER47	MZ-CCB-CER047				Marysol Trujano and Uri García		1		Adult																					Moneilema armatum							Animalia	Arthropoda	Insecta	Coleoptera	Cerambycidae
63	Other material	CCB-CER48	MZ-CCB-CER048				Marysol Trujano and Uri García		1		Adult																					Oncideres rhodosticta							Animalia	Arthropoda	Insecta	Coleoptera	Cerambycidae
64	Other material	CCB-CER49	MZ-CCB-CER049				Marysol Trujano and Uri García		1		Adult																					Oncideres rhodosticta							Animalia	Arthropoda	Insecta	Coleoptera	Cerambycidae
67	Other material	CCB-CER50	CNIN-CCB-CER50				Antonio Castro		1		Adult																					Prionus poultoni							Animalia	Arthropoda	Insecta	Coleoptera	Cerambycidae
70	Other material	CCB-CER51	CNIN-CCB-CER51				Oscar Pérez		1		Adult																					Meloemorpha aliena							Animalia	Arthropoda	Insecta	Coleoptera	Cerambycidae
71	Other material	CCB-CER52	CNIN-CCB-CER52				Oscar Pérez		1		Adult																					Meloemorpha aliena							Animalia	Arthropoda	Insecta	Coleoptera	Cerambycidae
74	Other material	CCB-CER53	CNIN-CCB-CER53				Rodolfo Trejo		1		Adult																					Neoclytus mucronatus mucronatus							Animalia	Arthropoda	Insecta	Coleoptera	Cerambycidae
75	Other material	CCB-CER54	CNIN-CCB-CER54				Rodolfo Trejo		1		Adult																					Neoclytus mucronatus mucronatus							Animalia	Arthropoda	Insecta	Coleoptera	Cerambycidae
76	Other material	CCB-CER55	CNIN-CCB-CER55				Rodolfo Trejo		1		Adult																					Neoclytus mucronatus mucronatus							Animalia	Arthropoda	Insecta	Coleoptera	Cerambycidae
78	Other material	CCB-CER56	CNIN-CCB-CER56				Oscar Pérez		1		Adult																					Eburia maccartyi							Animalia	Arthropoda	Insecta	Coleoptera	Cerambycidae
80	Other material	CCB-CER57	CNIN-CCB-CER57				Oscar Pérez		1		Adult																					Stenosphenus dolosus							Animalia	Arthropoda	Insecta	Coleoptera	Cerambycidae
82	Other material	CCB-CER58	CNIN-CCB-CER58				Cecilia Fernández		1		Adult																					Rhopalophora angustata							Animalia	Arthropoda	Insecta	Coleoptera	Cerambycidae
83	Other material	CCB-CER59	CNIN-CCB-CER59				Cecilia Fernández		1		Adult																					Rhopalophora angustata							Animalia	Arthropoda	Insecta	Coleoptera	Cerambycidae
85	Other material	CCB-CER60	CNIN-CCB-CER60				Mayra Cervantes		1		Adult																					Euderces basimaculatus							Animalia	Arthropoda	Insecta	Coleoptera	Cerambycidae
87	Other material	CCB-CER61	CNIN-CCB-CER61				Mayra Cervantes		1		Adult																					Chemsakiella michelbacheri							Animalia	Arthropoda	Insecta	Coleoptera	Cerambycidae
88	Other material	CCB-CER62	CNIN-CCB-CER62				Ángel Neria		1		Adult																					Crossidius mexicanus							Animalia	Arthropoda	Insecta	Coleoptera	Cerambycidae
89	Other material	CCB-CER63	CNIN-CCB-CER63				Oscar Pérez		1		Adult																					Crossidius mexicanus							Animalia	Arthropoda	Insecta	Coleoptera	Cerambycidae
90	Other material	CCB-CER64	CNIN-CCB-CER64				Oscar Pérez		1		Adult																					Elytroleptus divisus							Animalia	Arthropoda	Insecta	Coleoptera	Cerambycidae
[truncated: 107 more columns]

## Sheet: ExternalLinks
Taxon_Local_ID	Link type	Link
